# Supplementary material for: MiR-30c-5p loss-induced PELI1 accumulation regulates cell proliferation and migration via activating PI3K/AKT pathway in papillary thyroid carcinoma
Source: J Transl Med. 2022 Jan 6;20:20. doi: 10.1186/s12967-021-03226-1 (PMC8740468; doi:10.1186/s12967-021-03226-1)
Supplement: Supplementary file 2 — Additional file 2: The co-expressed genes that were associated with PI3K-AKT pathway. [file 12967_2021_3226_MOESM2_ESM.xls]

## Sheet: Sheet1
Gene name
BCL2L1
ITGA9
CREB5
MET
MCL1
IL4R
YWHAZ
CDKN1A
IL6R
OSMR
ITGA2
ITGB4
EPHA2
IFNAR2
ITGB1
AREG
